# Supplementary material for: Endogenous IQGAP1 and IQGAP3 do not functionally interact with Ras
Source: PubMed Central journal article supplement (PMC6667474; doi:10.1038/s41598-019-46677-9), 2019-07-30

## Supplementary Figure Panels

Manuscript Title: Endogenous IQGAP1 and IQGAP3 do not functionally interact with Ras

Authors: Chase J. Morgan, Andrew C. Hedman, Zhigang Li, David B. Sacks\*

From the Department of Laboratory Medicine, National Institutes of Health, 10 Center Drive, Bethesda, Maryland 20892, USA.

\*To whom correspondence should be addressed: David B. Sacks, Department of Laboratory Medicine, National Institutes of Health, 10 Center Drive, Bethesda, Maryland 20892, USA. [sacksdb@nih.gov](mailto:sacksdb@nih.gov)

**Supplementary Figure 1.**  
**Full-length blots and gels**

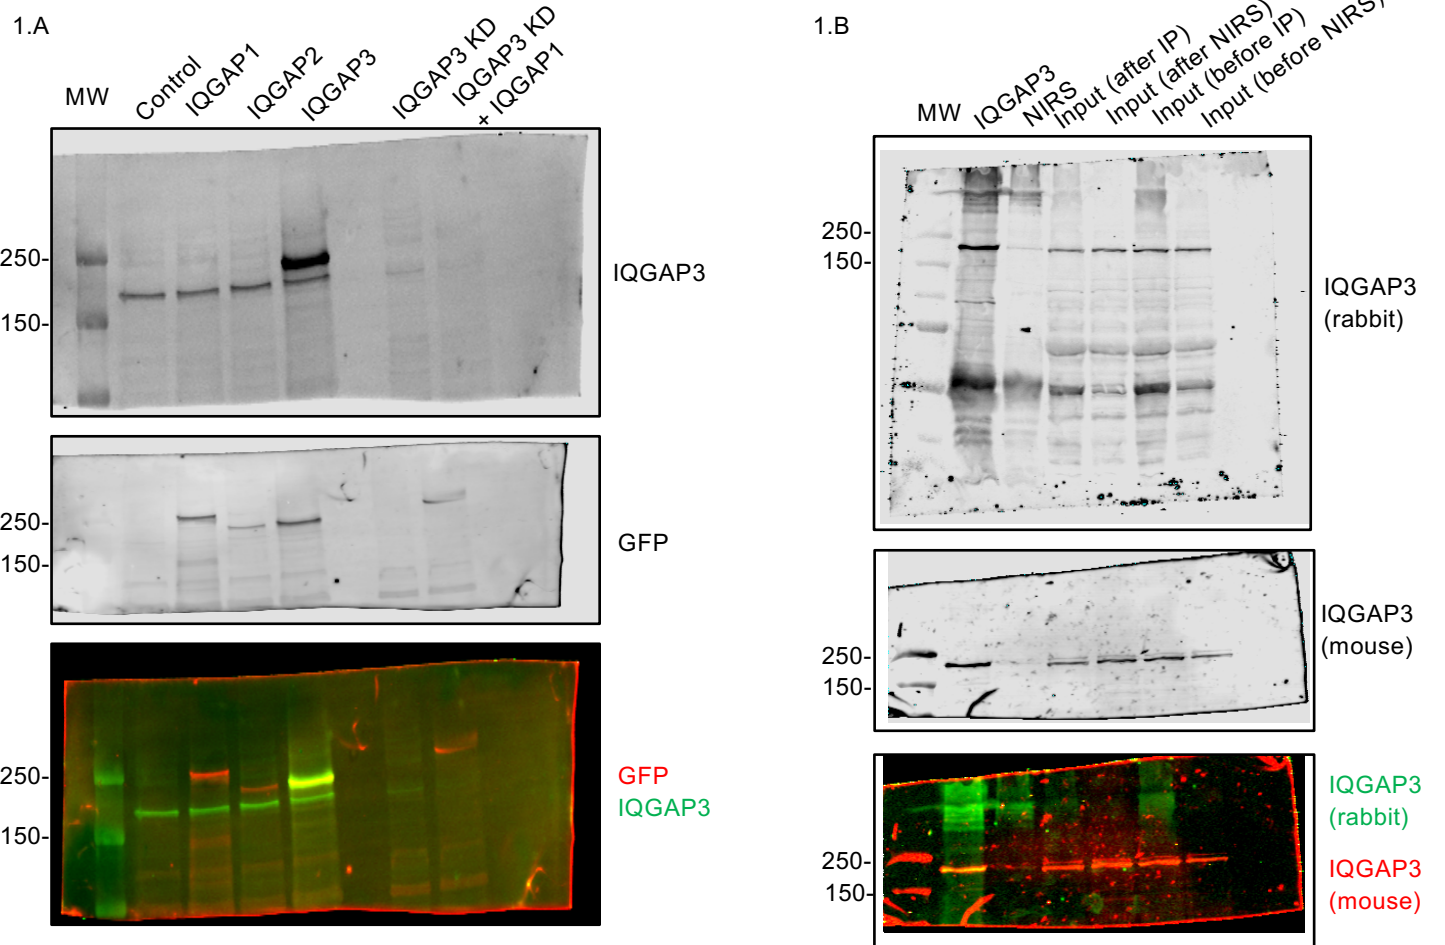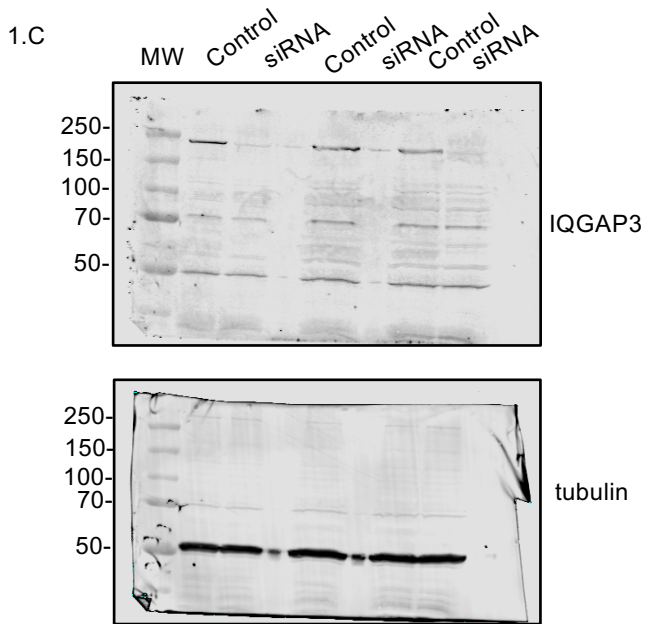

Supplementary Figure 2.

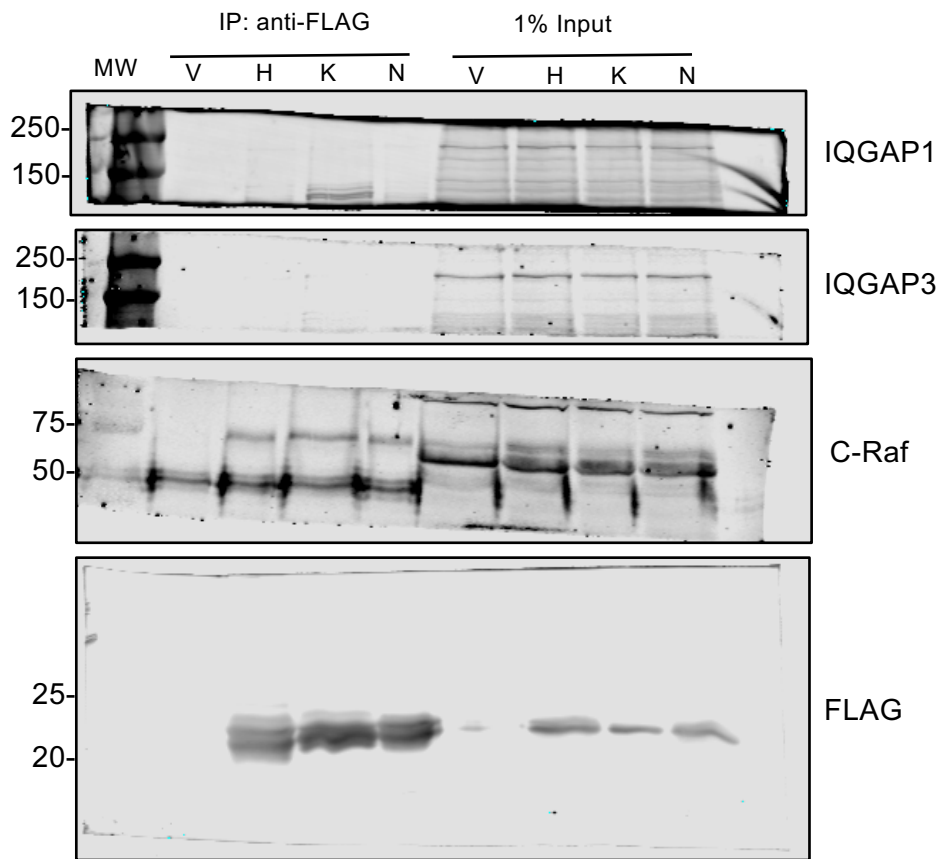

Supplementary Figure 3.

3.A

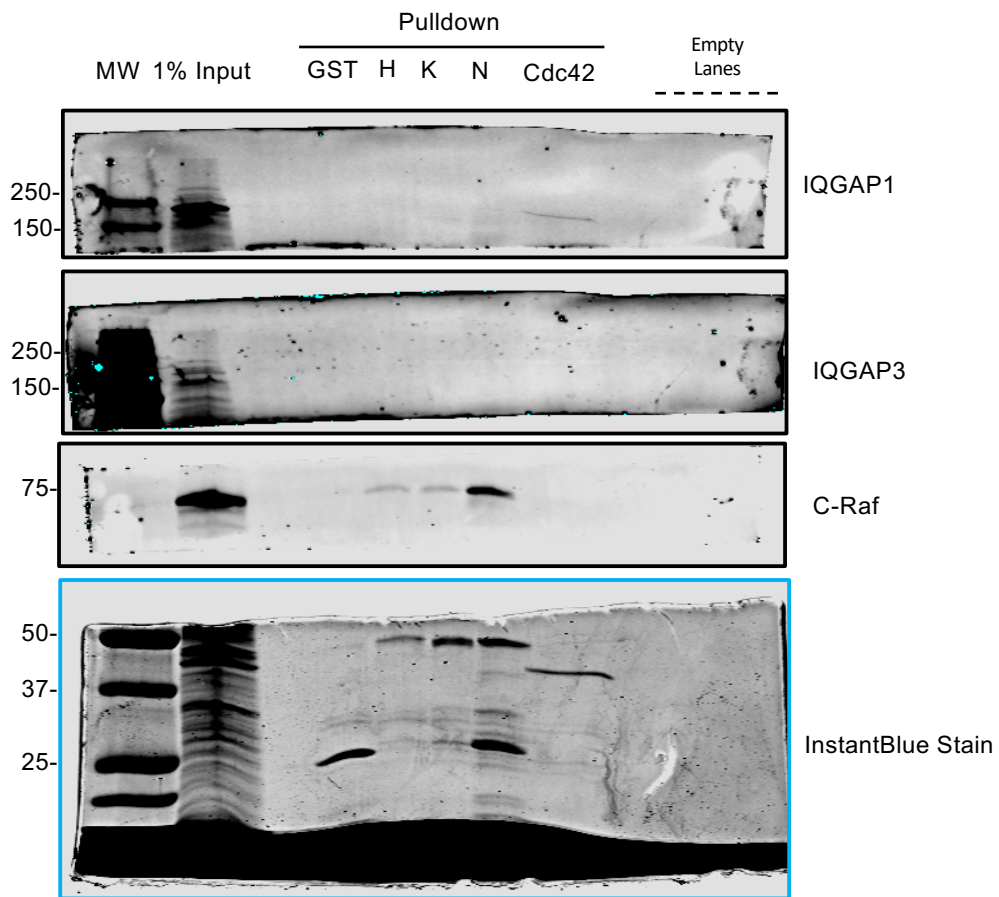

3.B

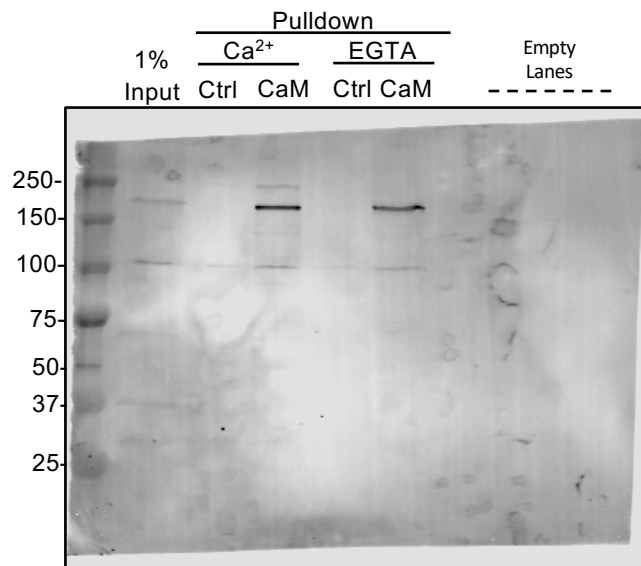



**Supplementary Figure 4.**

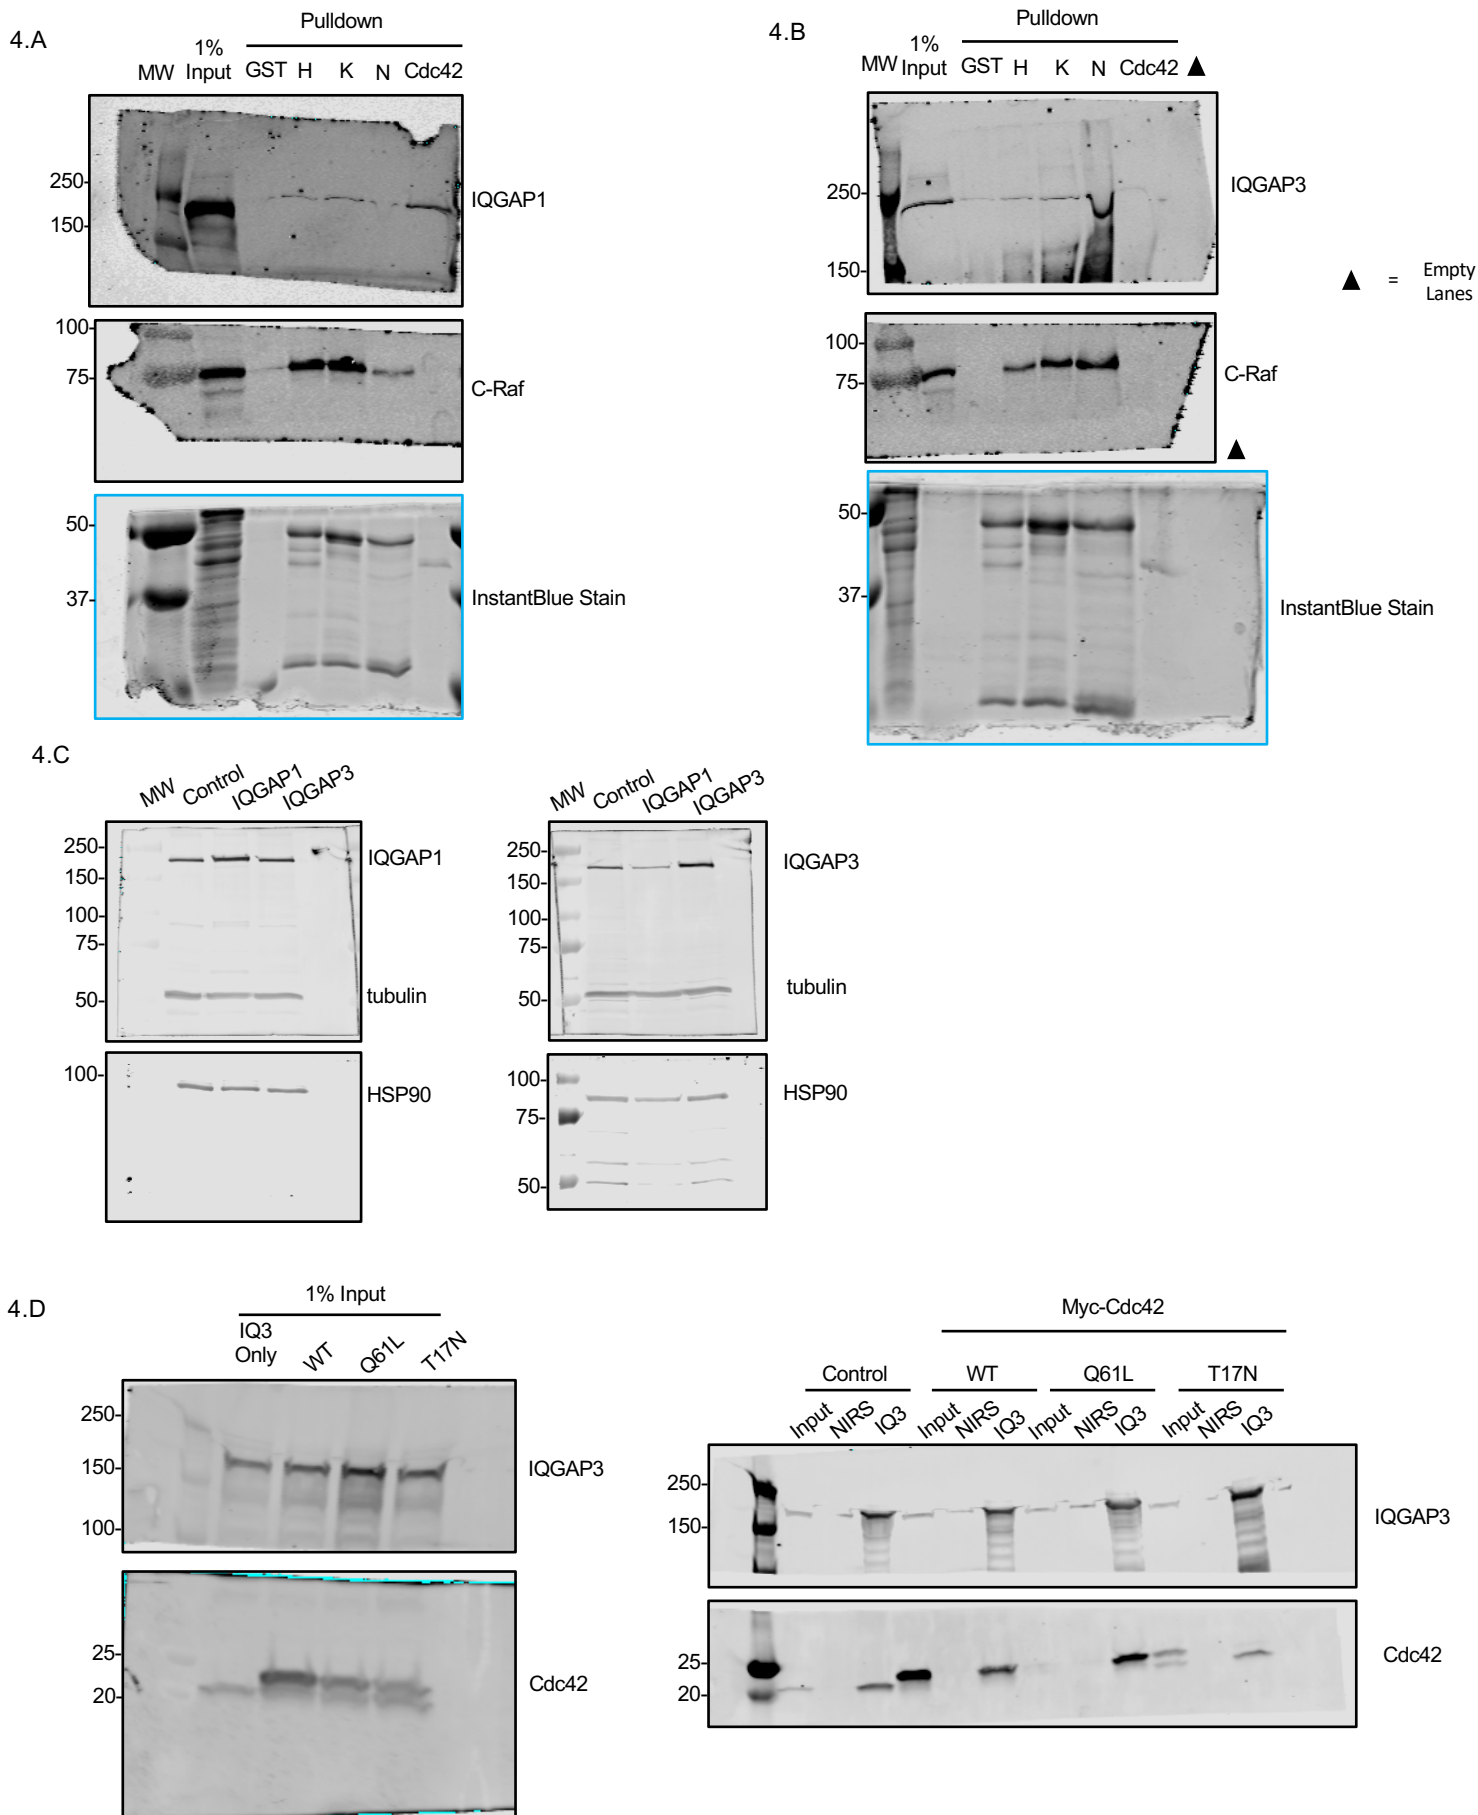

**Supplementary Figure 5.**

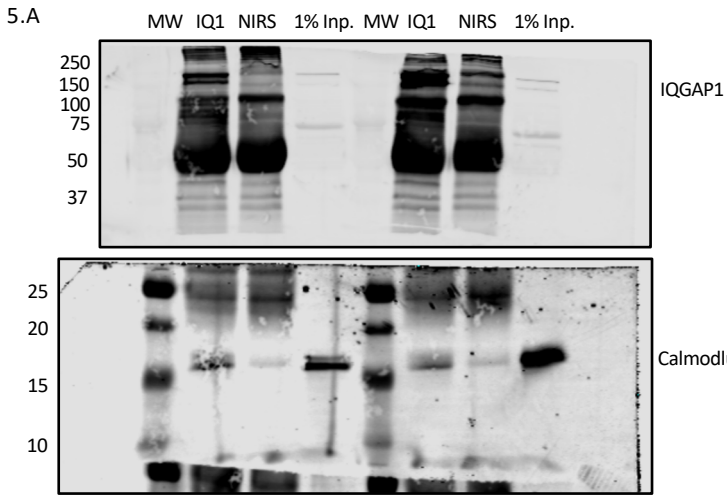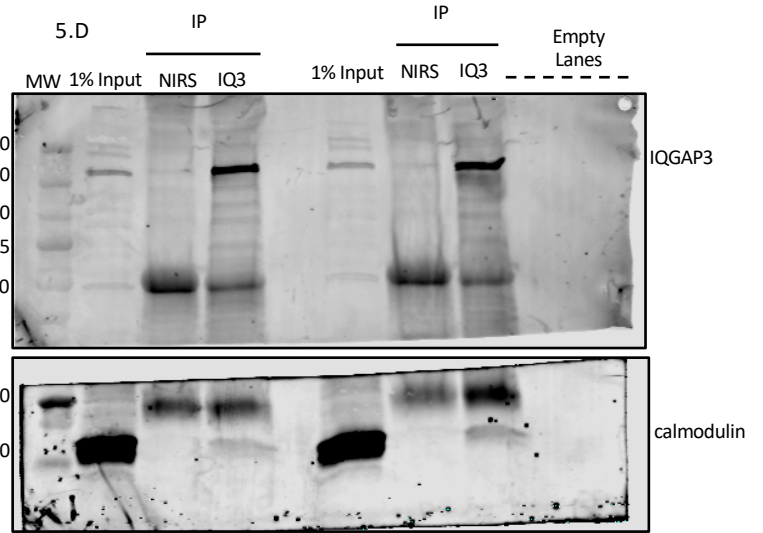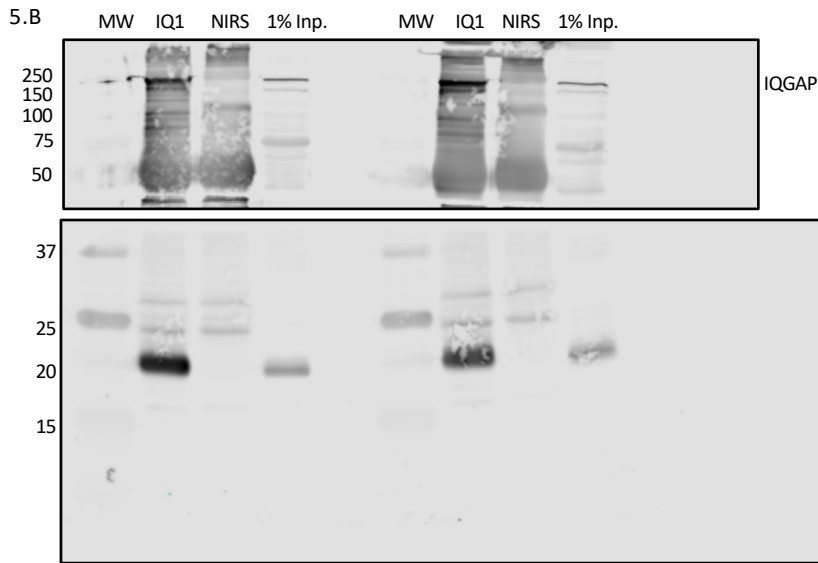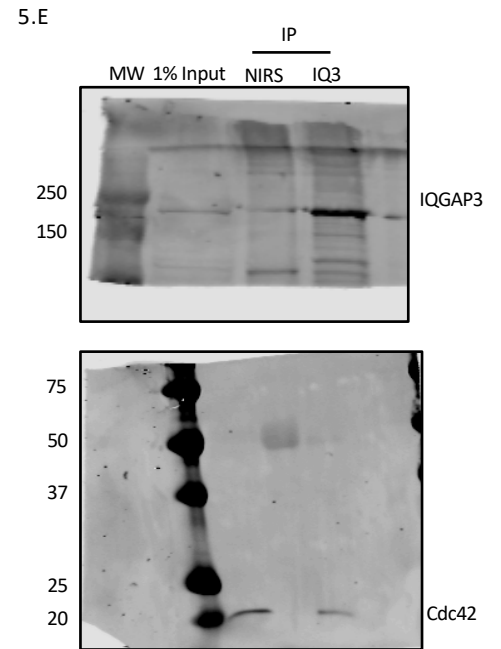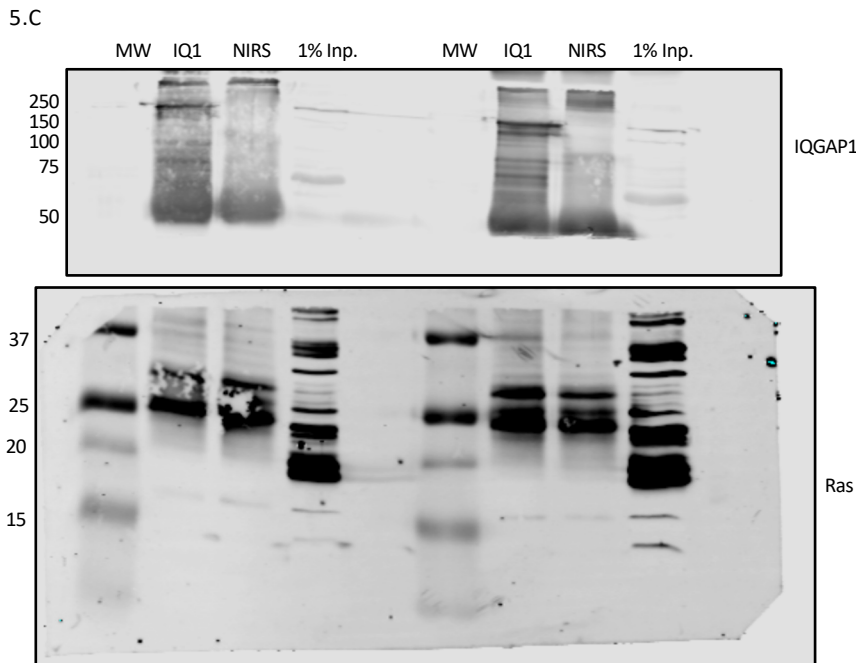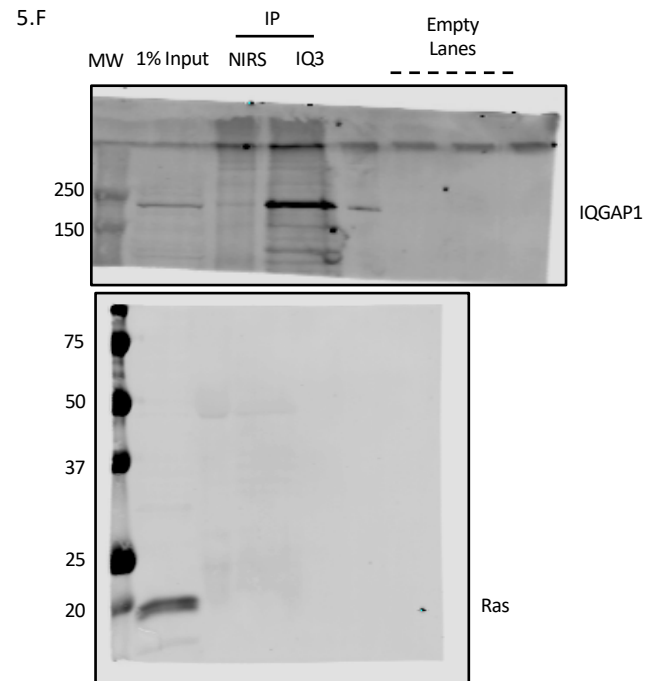

# Supplementary Figure 6.

6.B

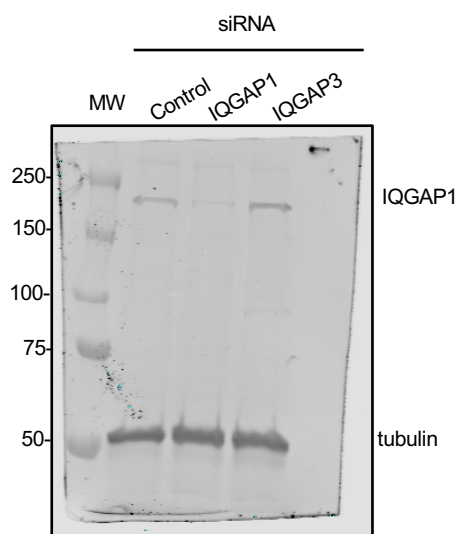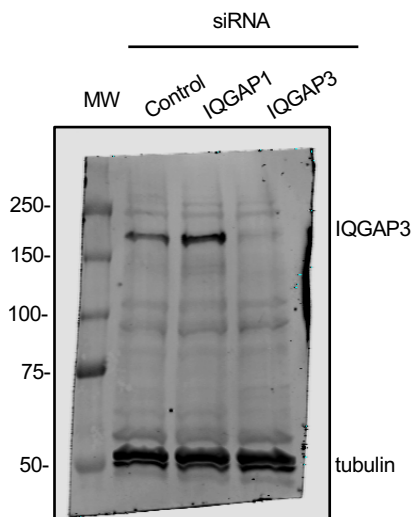

6.C

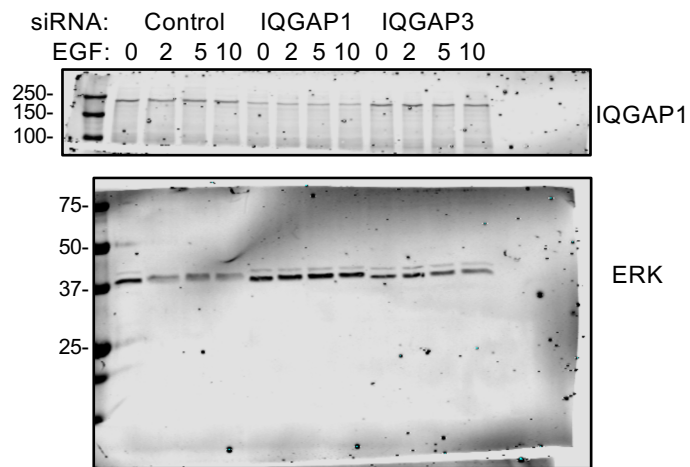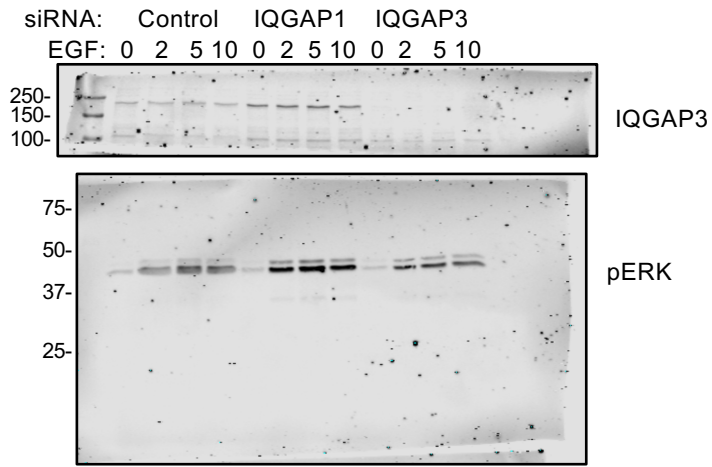

Supplement: 41598_2019_46677_MOESM1_ESM.pdf [file 41598_2019_46677_MOESM1_ESM.pdf]
